# Supplementary material for: Monitoring and Determining Mitochondrial Network Parameters in Live Lung Cancer Cells
Source: MDPI journal article supplement (doi:10.3390/jcm8101723), 2019-10-18
Supplement: s1 [file s1]

## Supplemental Data

### Supplemental Figure S1

**A**

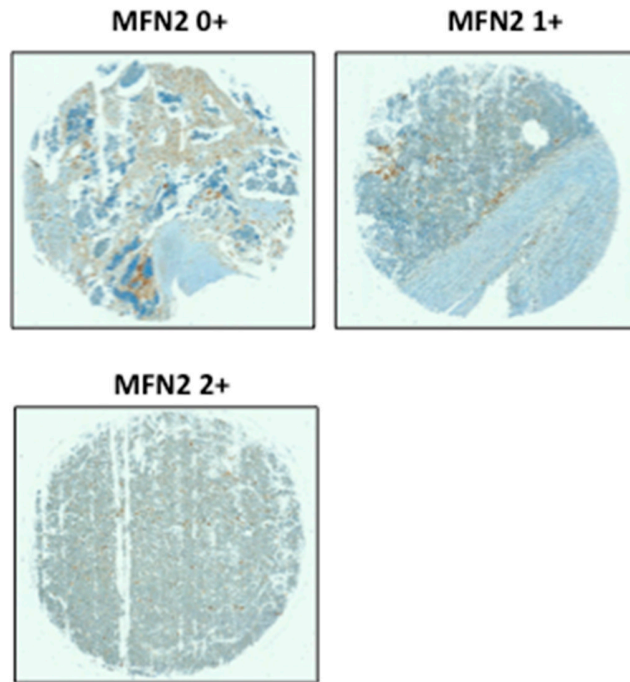

**B**

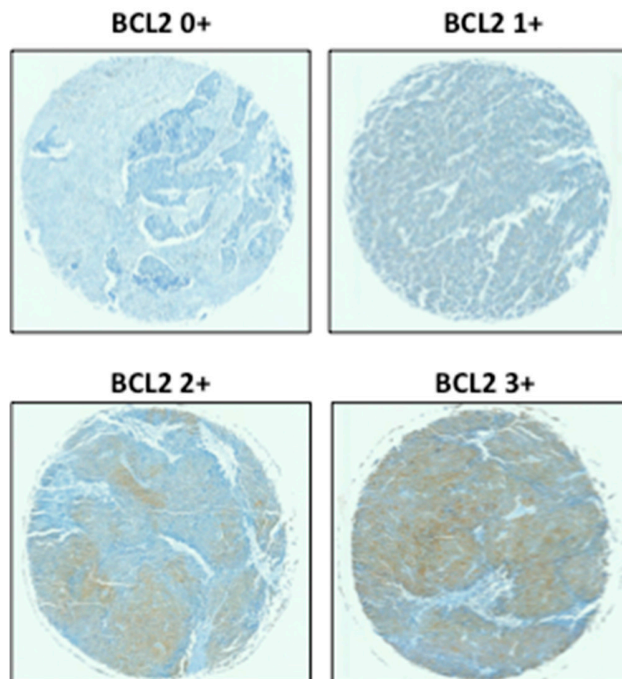

**Supplemental Figure S1. A and B.** Representative images of immunohistochemical staining of MFN2 and BCL2 in human small cell lung cancer tissue microarray. Detailed procedures are described in “Materials and methods.”

## Supplemental Figure S2

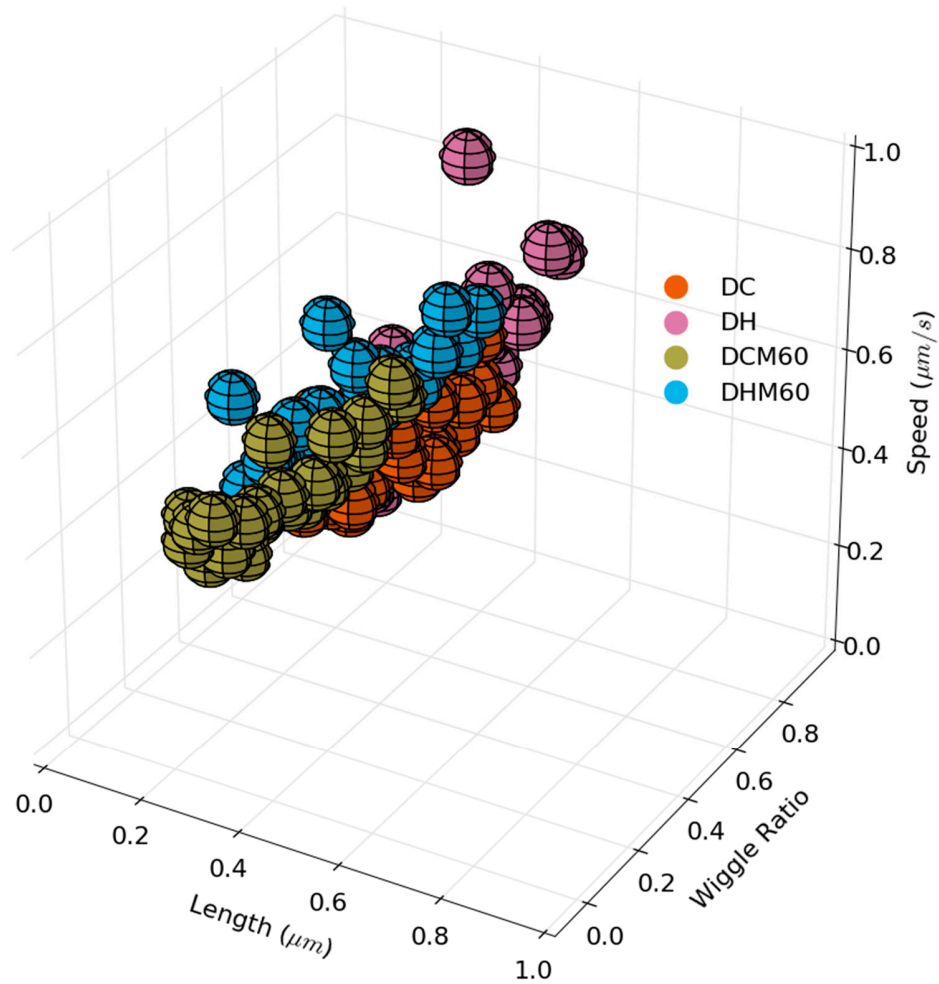

**Supplemental Figure S2. Comparison of mitochondrial parameters in MDS273 cells before and after MDIVI-1 treatment in 60 min.** 3D scatter plot shows the relationship between length (X-axis), wiggle ratio (Y-axis) and speed (Z-axis).

**Supplemental Figure S3**

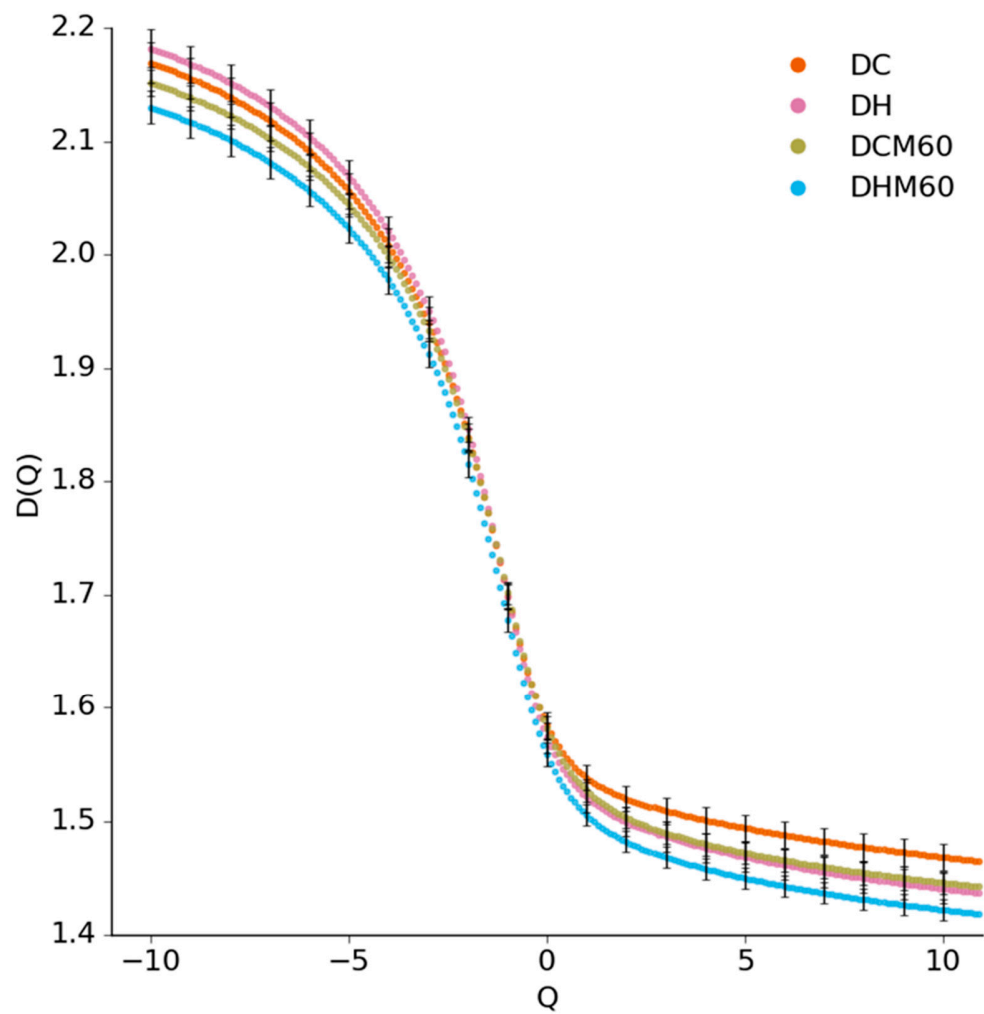

**Supplemental Figure S3. Multifractal analysis of mitochondrial network after 60 min treatment with MDIVI-1.** Generalized dimensions of all mitochondrial regions for BC-BH and DC-DH.

#### Supplemental Figure S4

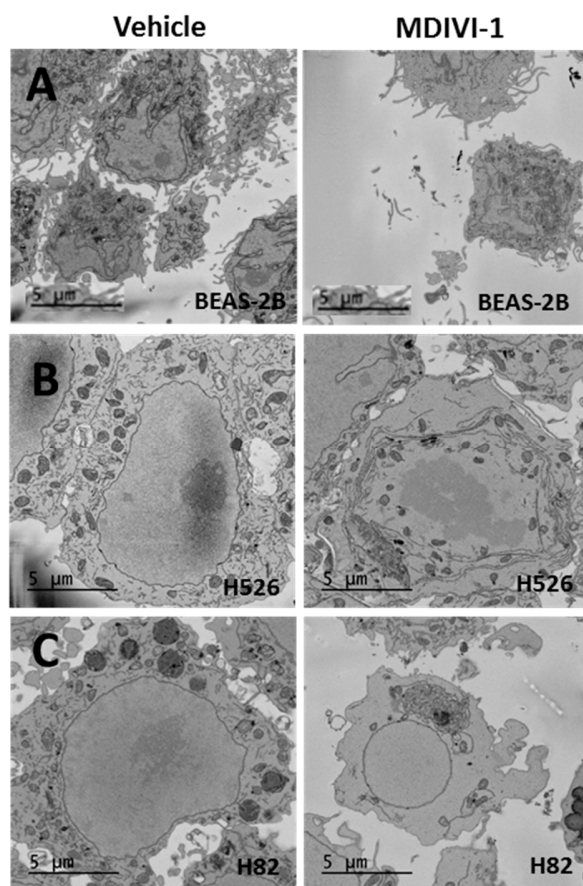

**Supplemental Figure S4. Electron microscopy.** Cells, cultured at 70% confluence, were fixed with 2.5% glutaraldehyde in 0.15 M cacodylate buffer pH 7.4. The cell pellet was then subjected to overnight infiltration in Dureapam Acm. Epoxy Resin (Electron Microscopy Sciences), flat embedding, and polymerisation at 55°C for 48 h. Embedded cells were mounted on resin stubs and sectioned at 70 nm with an Ultracut E ultramicrotome. Sections were viewed and photographed with a Zeiss Sigma VP. **A-C:** The pictures presented are representative for the experiment without and with MDIVI-1 (20 μM) treatment. 1000 images per cell was captured and used for three-dimensional reconstruction.

**Supplemental Table S1. SCLC Tissue Microarray IHC scores of DRP1 and stages of disease.**

| Staining Intensity |    |              |              |              |              |
|--------------------|----|--------------|--------------|--------------|--------------|
|                    | N  | 0+           | 1+           | 2+           | 3+           |
| <b>DRP1</b>        | 80 | 9 (Stage I)  | 21(Stage I)  | 9(Stage I)   | 0(Stage I)   |
|                    |    | 1(Stage II)  | 21(Stage II) | 6(Stage II)  | 0(Stage II)  |
|                    |    | 0(Stage III) | 7(Stage III) | 4(Stage III) | 1(Stage III) |
|                    |    | 0(Stage IV)  | 1(Stage IV)  | 0(Stage IV)  | 0(Stage IV)  |
|                    |    | <b>10</b>    | <b>50</b>    | <b>19</b>    | <b>1</b>     |

**Supplemental Table S2. The values of mean Fractal Dimension ( $D_B$ ) and Lacunarity ( $\Lambda$ ) of DRP1 stained control and small cell carcinoma lung tissue**

| Sample | $D_B$  | SE     | <i>P</i> value<br>vs NL | $\Lambda$ | SE     | <i>P</i> value<br>vs NL |
|--------|--------|--------|-------------------------|-----------|--------|-------------------------|
| NL     | 1.5392 | 0.0142 |                         | 0.2861    | 0.0245 |                         |
| I      | 1.6842 | 0.0020 | <0.0001                 | 0.1510    | 0.0246 | <0.001                  |
| IA     | 1.6986 | 0.0058 | <0.0001                 | 0.1563    | 0.0105 | <0.0001                 |
| IB     | 1.6963 | 0.0031 | <0.0001                 | 0.1487    | 0.0038 | <0.0001                 |
| II     | 1.6926 | 0.0056 | <0.0001                 | 0.1680    | 0.0127 | <0.0001                 |
| IIA    | 1.6764 | 0.0063 | <0.0001                 | 0.1500    | 0.0126 | <0.0001                 |
| IIB    | 1.6824 | 0.0073 | <0.0001                 | 0.1718    | 0.0326 | <0.0001                 |
| IIIA   | 1.6811 | 0.0089 | <0.0001                 | 0.1252    | 0.0094 | <0.0001                 |
| IIIB   | 1.6942 |        |                         | 0.0876    |        |                         |
| IV     | 1.6849 |        |                         | 0.1217    |        |                         |

IIIB and IV groups contain one tissue specimen per group.

**Supplemental Table S3. Scanning parameters for acquiring high resolution images of mitochondria**

| Parameter       | Value                       |
|-----------------|-----------------------------|
| Zoom            | 2                           |
| Pixel size      | 0.04 $\mu\text{m}$ /pixel   |
| Scan Speed      | 1.77 $\mu\text{sec}$ /pixel |
| Pinhole         | 2 UA                        |
| Laser Intensity | 561nm @ 1%, 405nm @ 5%      |
| Detector gain   | Red 800, Blue 857           |
